# Supplementary material for: Nuclear Receptors Are Differentially Expressed and Activated in KAIMRC1 Compared to MCF7 and MDA-MB231 Breast Cancer Cells
Source: MDPI journal article supplement (doi:10.3390/molecules24112028), 2019-05-28
Supplement: s1 [file s1]

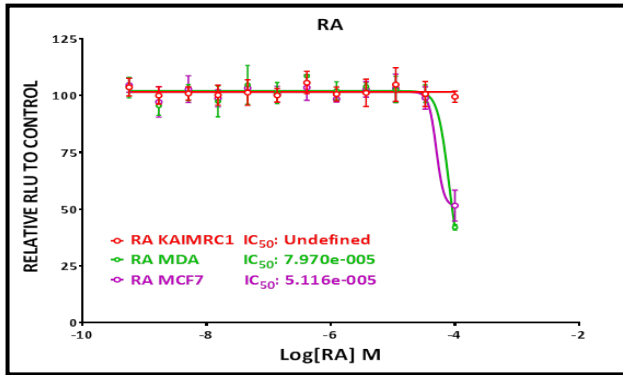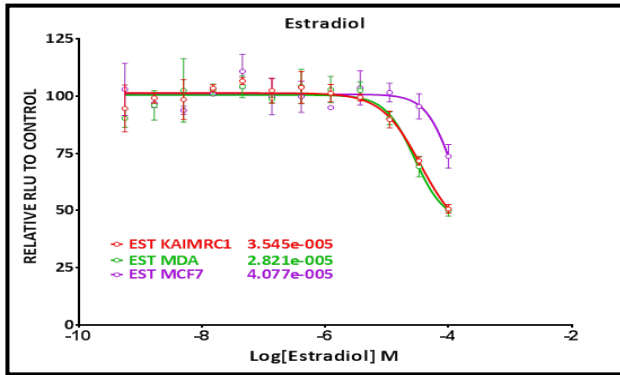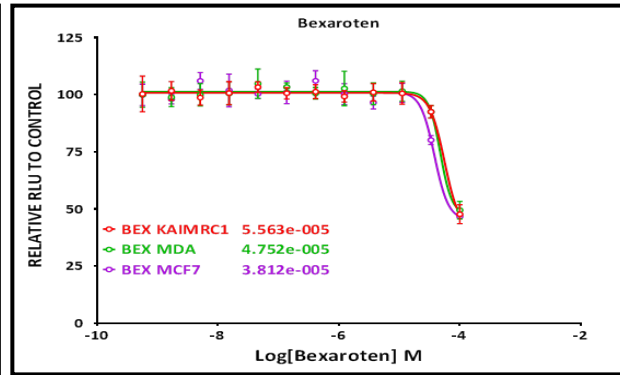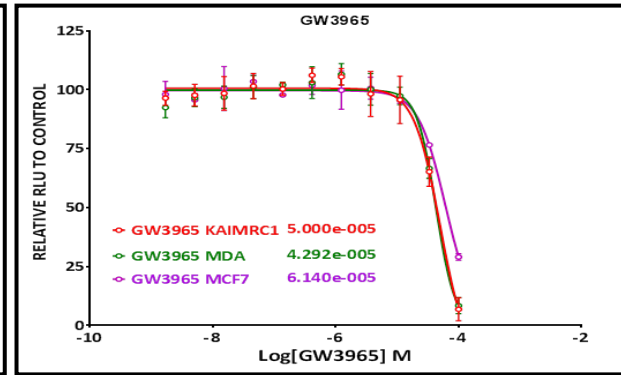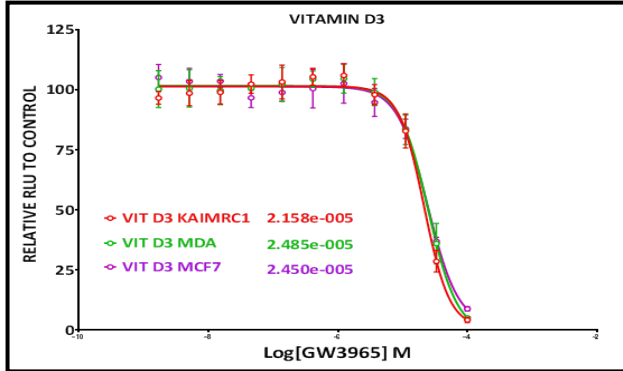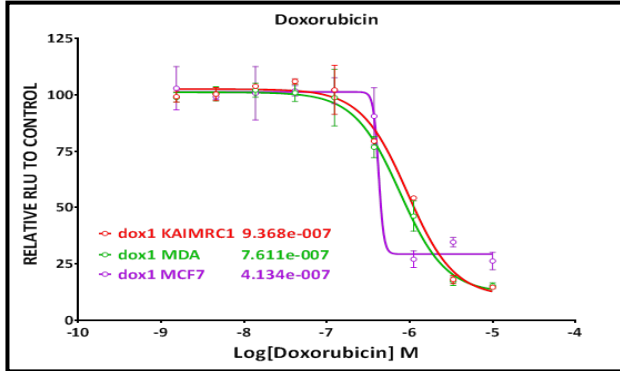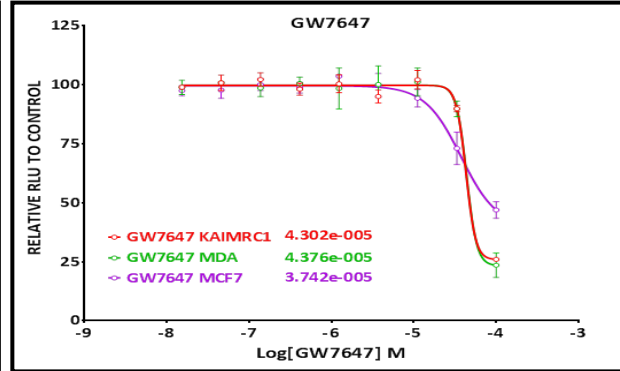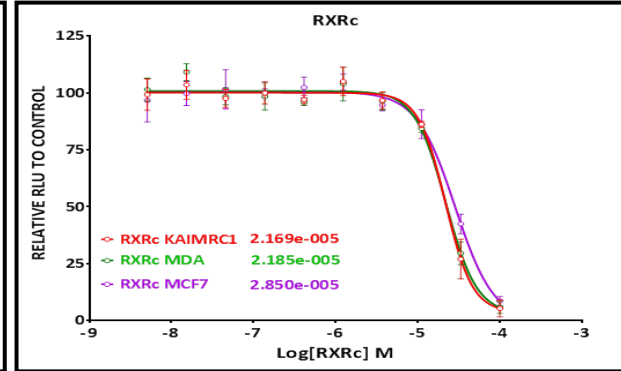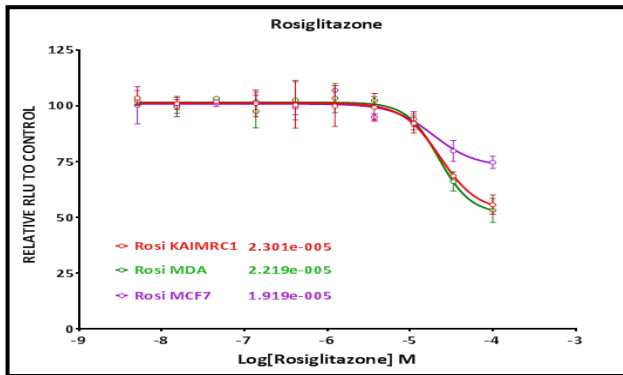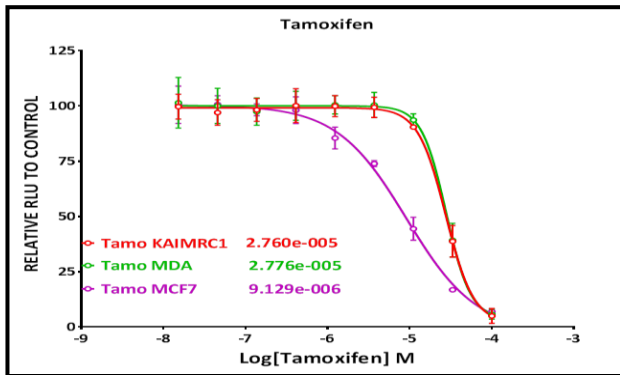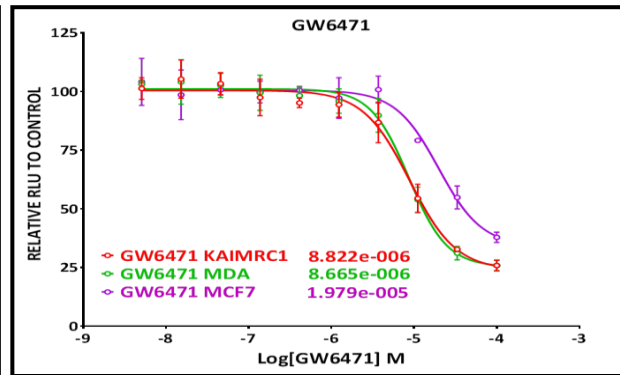

**Supplementary Figure 1: Growth inhibition effect of nuclear-receptors ligands (NRLs) on MDA-MB231, MCF7 and KAIMRC1 cell lines.** To determine their differential sensitivity to NRLs, the three cell lines MDA-MB231, MCF7 and KAIMRC1, were incubated for 48 with a gradient concentration of the different NRLs. Growth inhibition/cytotoxicity was assessed using the luminescence-based assay cell-Titer glo and represented (with  $IC_{50}$  values) as dose-response curves.
